# Supplementary material
Source: publisher site journal article supplement (https://www.dovepress.com/article/619944)
Supplement: Supplementary file 1 [file 619944%20Supplementary%20Material.docx]

Table S1. Age-standardized DALYs rates (per 100,000) of IHD and asthma by countries and territories and dominant disease patterns

| location | Age-standardized DALYs rate per 100,000 (95% UI) of IHD | Age-standardized DALYs rate per 100,000 (95% UI) of asthma | Co-occurrence pattern |
| --- | --- | --- | --- |
| Afghanistan | 6178.27 (4747.55, 7813.31) | 723.55 (523.73, 1068.14) | Consistent |
| Albania | 2558.27 (2184.88, 2998.29) | 164.34 (117.39, 221.43) | IHD-dominant |
| Algeria | 3451.99 (2806.95, 4159.87) | 262.04 (207.42, 335.38) | IHD-dominant |
| American Samoa | 4053.34 (3456.83, 4752.36) | 255.84 (211.86, 307.27) | IHD-dominant |
| Andorra | 724.42 (539.10, 929.50) | 274.90 (177.12, 406.89) | Asthma-dominant |
| Angola | 2529.04 (1954.37, 3169.14) | 372.34 (272.50, 533.16) | Consistent |
| Antigua and Barbuda | 1306.35 (1226.11, 1441.33) | 283.45 (194.54, 399.95) | Asthma-dominant |
| Argentina | 1179.87 (1113.64, 1234.14) | 254.65 (168.36, 373.79) | Asthma-dominant |
| Armenia | 3788.46 (3403.75, 4233.65) | 77.58 (49.39, 111.42) | IHD-dominant |
| Australia | 768.62 (696.10, 814.23) | 339.03 (224.11, 491.02) | Asthma-dominant |
| Austria | 1121.64 (1017.81, 1189.70) | 203.05 (131.38, 297.43) | Consistent |
| Azerbaijan | 5496.28 (4818.68, 6182.32) | 168.18 (128.90, 222.22) | IHD-dominant |
| Bahamas | 1624.95 (1339.72, 1979.27) | 293.41 (201.58, 415.07) | Asthma-dominant |
| Bahrain | 2796.56 (2418.62, 3179.47) | 235.38 (180.45, 297.57) | IHD-dominant |
| Bangladesh | 2366.92 (1856.38, 2929.73) | 302.36 (215.66, 430.80) | Consistent |
| Barbados | 1150.80 (936.24, 1387.58) | 389.41 (265.53, 548.27) | Asthma-dominant |
| Belarus | 6244.29 (5262.84, 7270.21) | 172.81 (111.20, 252.04) | IHD-dominant |
| Belgium | 698.85 (638.41, 740.15) | 197.86 (128.89, 283.86) | Consistent |
| Belize | 1363.17 (1223.34, 1513.59) | 314.73 (228.21, 437.74) | Asthma-dominant |
| Benin | 1514.95 (1244.52, 1848.81) | 387.98 (294.52, 541.01) | Asthma-dominant |
| Bermuda | 1283.78 (1113.11, 1520.67) | 287.45 (187.56, 432.06) | Asthma-dominant |
| Bhutan | 2299.54 (1757.99, 2871.27) | 314.43 (214.89, 520.28) | Consistent |
| Bolivia (Plurinational State of) | 1602.36 (1154.23, 2291.24) | 182.08 (129.08, 254.94) | IHD-dominant |
| Bosnia and Herzegovina | 2450.20 (2019.97, 2859.40) | 214.33 (139.38, 307.99) | IHD-dominant |
| Botswana | 1574.31 (1216.62, 1984.60) | 459.60 (346.69, 606.33) | Asthma-dominant |
| Brazil | 1469.72 (1380.14, 1530.27) | 218.44 (146.66, 318.69) | Consistent |
| Brunei Darussalam | 1726.32 (1525.62, 1929.94) | 297.39 (229.84, 384.26) | Asthma-dominant |
| Bulgaria | 3852.25 (3333.94, 4409.66) | 150.20 (94.54, 221.21) | IHD-dominant |
| Burkina Faso | 1884.27 (1448.29, 2432.51) | 372.73 (291.47, 478.24) | Asthma-dominant |
| Burundi | 1841.44 (1452.49, 2345.53) | 496.27 (374.07, 708.63) | Asthma-dominant |
| Cabo Verde | 2236.65 (1830.13, 2642.40) | 212.67 (156.95, 280.65) | IHD-dominant |
| Cambodia | 2251.18 (1767.77, 2790.06) | 348.54 (281.01, 439.83) | Consistent |
| Cameroon | 2044.68 (1551.58, 2747.31) | 342.79 (264.02, 454.54) | Asthma-dominant |
| Canada | 922.52 (849.26, 968.23) | 246.57 (160.72, 370.01) | Asthma-dominant |
| Central African Republic | 3256.90 (2364.11, 4604.40) | 810.90 (526.96, 1540.17) | Consistent |
| Chad | 2128.18 (1619.46, 2717.98) | 486.38 (353.99, 630.42) | Asthma-dominant |
| Chile | 808.36 (760.79, 847.46) | 262.74 (172.80, 377.04) | Asthma-dominant |
| China | 1856.51 (1548.73, 2159.82) | 103.76 (72.50, 145.46) | IHD-dominant |
| Colombia | 1502.23 (1264.42, 1754.08) | 154.16 (97.65, 227.06) | IHD-dominant |
| Comoros | 1526.07 (1137.18, 1995.75) | 411.71 (306.54, 556.76) | Asthma-dominant |
| Congo | 3210.45 (2515.58, 3995.70) | 430.55 (323.25, 594.49) | Consistent |
| Cook Islands | 2344.82 (1931.57, 2837.91) | 163.88 (125.75, 211.37) | IHD-dominant |
| Costa Rica | 1157.79 (1033.42, 1276.35) | 259.28 (167.05, 381.02) | Asthma-dominant |
| Croatia | 2099.58 (1856.50, 2326.01) | 172.89 (111.91, 249.80) | IHD-dominant |
| Cuba | 2017.01 (1763.50, 2255.67) | 352.07 (236.89, 512.31) | Asthma-dominant |
| Cyprus | 1394.96 (1225.32, 1564.95) | 327.15 (214.70, 474.70) | Asthma-dominant |
| Czechia | 2101.42 (1857.11, 2327.15) | 130.54 (82.46, 189.09) | IHD-dominant |
| Côte d'Ivoire | 2390.53 (1895.80, 3151.33) | 392.14 (310.93, 510.83) | Consistent |
| Democratic People's Republic of Korea | 2594.23 (2058.22, 3211.81) | 261.75 (192.30, 354.02) | IHD-dominant |
| Democratic Republic of the Congo | 2290.38 (1696.29, 3056.52) | 524.01 (333.13, 1078.47) | Asthma-dominant |
| Denmark | 710.23 (653.57, 756.00) | 201.33 (132.68, 287.34) | Consistent |
| Djibouti | 1927.16 (1417.07, 2555.52) | 312.59 (210.89, 427.86) | Asthma-dominant |
| Dominica | 1738.90 (1513.77, 2064.50) | 388.02 (296.10, 520.35) | Asthma-dominant |
| Dominican Republic | 3104.02 (2494.68, 3824.78) | 257.66 (192.32, 336.45) | IHD-dominant |
| Ecuador | 1433.67 (1158.90, 1770.44) | 146.48 (92.22, 220.24) | Consistent |
| Egypt | 6924.84 (5844.94, 8119.21) | 253.99 (203.08, 317.77) | IHD-dominant |
| El Salvador | 1915.93 (1577.46, 2311.23) | 290.35 (200.21, 407.08) | Asthma-dominant |
| Equatorial Guinea | 2751.44 (1907.88, 3773.97) | 280.76 (201.13, 404.76) | IHD-dominant |
| Eritrea | 1974.98 (1470.40, 2570.23) | 512.91 (394.68, 652.26) | Asthma-dominant |
| Estonia | 1547.87 (1370.40, 1716.96) | 121.76 (80.14, 174.48) | IHD-dominant |
| Eswatini | 2334.11 (1612.79, 3342.38) | 785.68 (585.13, 1028.73) | Asthma-dominant |
| Ethiopia | 1177.38 (959.27, 1410.32) | 262.05 (204.68, 343.92) | Asthma-dominant |
| Fiji | 5965.61 (4721.09, 7391.81) | 902.00 (692.38, 1099.45) | Consistent |
| Finland | 1299.12 (1163.23, 1383.11) | 255.52 (165.78, 365.93) | Asthma-dominant |
| France | 555.98 (503.45, 597.26) | 261.16 (167.84, 381.11) | Asthma-dominant |
| Gabon | 2479.16 (1901.20, 3118.09) | 298.59 (220.58, 425.21) | Consistent |
| Gambia | 2771.50 (2116.36, 3471.60) | 438.22 (311.28, 611.30) | Asthma-dominant |
| Georgia | 2565.24 (2301.90, 2822.20) | 114.84 (84.72, 157.41) | IHD-dominant |
| Germany | 1096.63 (993.52, 1160.04) | 183.45 (118.99, 260.58) | Consistent |
| Ghana | 1954.33 (1558.46, 2392.96) | 262.89 (207.71, 320.22) | Consistent |
| Greece | 1443.35 (1353.57, 1503.27) | 194.28 (122.70, 283.15) | IHD-dominant |
| Greenland | 1632.37 (1432.87, 1918.70) | 350.58 (241.65, 494.61) | Asthma-dominant |
| Grenada | 1924.27 (1678.96, 2155.00) | 421.23 (285.08, 609.56) | Asthma-dominant |
| Guam | 3413.08 (3110.68, 3756.02) | 111.70 (85.64, 146.58) | IHD-dominant |
| Guatemala | 1732.06 (1517.52, 1959.37) | 157.74 (115.65, 212.96) | IHD-dominant |
| Guinea | 2209.38 (1690.78, 2864.84) | 495.17 (372.99, 670.58) | Asthma-dominant |
| Guinea-Bissau | 3270.22 (2536.54, 4074.07) | 623.94 (453.27, 818.44) | Consistent |
| Guyana | 3075.23 (2425.76, 3871.77) | 362.10 (274.14, 485.52) | Consistent |
| Haiti | 4370.88 (3271.69, 5735.77) | 848.53 (577.02, 1227.27) | Consistent |
| Honduras | 3075.05 (2550.80, 3764.35) | 258.37 (195.88, 342.63) | IHD-dominant |
| Hungary | 2780.98 (2470.60, 3060.36) | 140.13 (89.28, 205.88) | IHD-dominant |
| Iceland | 990.46 (883.50, 1083.79) | 306.55 (193.06, 453.24) | Asthma-dominant |
| India | 3400.03 (3098.47, 3720.83) | 494.11 (379.17, 688.82) | Consistent |
| Indonesia | 3043.08 (2527.28, 3544.71) | 427.07 (358.92, 518.04) | Consistent |
| Iran (Islamic Republic of) | 2731.30 (2517.27, 2920.87) | 206.07 (163.74, 263.65) | IHD-dominant |
| Iraq | 4905.27 (3858.32, 5827.68) | 217.33 (164.07, 284.68) | IHD-dominant |
| Ireland | 924.25 (829.87, 991.72) | 288.14 (181.03, 418.26) | Asthma-dominant |
| Israel | 599.57 (537.77, 637.80) | 169.53 (112.34, 240.20) | Consistent |
| Italy | 747.14 (673.73, 791.65) | 152.36 (96.46, 227.36) | Consistent |
| Jamaica | 1054.54 (837.96, 1345.47) | 306.43 (213.90, 425.89) | Asthma-dominant |
| Japan | 502.25 (460.02, 526.29) | 144.10 (92.75, 215.89) | Consistent |
| Jordan | 1947.22 (1603.41, 2349.61) | 177.22 (124.82, 238.37) | IHD-dominant |
| Kazakhstan | 3970.50 (3569.75, 4401.12) | 250.39 (200.75, 310.78) | IHD-dominant |
| Kenya | 1244.93 (964.97, 1595.88) | 336.71 (218.48, 750.49) | Asthma-dominant |
| Kiribati | 4969.44 (4015.48, 6139.26) | 819.15 (598.22, 1316.21) | Consistent |
| Kuwait | 2299.44 (1917.04, 2762.48) | 159.10 (105.45, 226.99) | IHD-dominant |
| Kyrgyzstan | 4780.48 (4093.58, 5490.56) | 134.59 (96.49, 185.34) | IHD-dominant |
| Lao People's Democratic Republic | 3667.08 (2896.80, 4573.18) | 476.11 (330.12, 664.93) | Consistent |
| Latvia | 2916.55 (2581.61, 3230.55) | 138.09 (91.66, 198.68) | IHD-dominant |
| Lebanon | 1735.30 (1488.38, 2027.36) | 211.11 (145.77, 293.63) | Consistent |
| Lesotho | 1949.42 (1307.36, 2989.62) | 710.93 (488.30, 995.68) | Asthma-dominant |
| Liberia | 2264.00 (1760.67, 2953.76) | 368.79 (278.05, 494.20) | Consistent |
| Libya | 3765.46 (2952.85, 4839.08) | 317.81 (248.33, 405.14) | IHD-dominant |
| Lithuania | 3332.30 (3000.98, 3676.82) | 121.55 (77.84, 176.01) | IHD-dominant |
| Luxembourg | 789.76 (717.69, 867.80) | 299.76 (194.31, 439.47) | Asthma-dominant |
| Madagascar | 2205.88 (1634.85, 2810.29) | 812.66 (604.54, 1110.69) | Asthma-dominant |
| Malawi | 1869.90 (1556.40, 2221.41) | 435.47 (328.07, 589.40) | Asthma-dominant |
| Malaysia | 3180.36 (2984.07, 3352.24) | 189.06 (148.21, 242.89) | IHD-dominant |
| Maldives | 1481.02 (1238.38, 1759.98) | 157.09 (122.62, 199.10) | IHD-dominant |
| Mali | 1439.78 (1125.23, 1851.95) | 641.45 (458.54, 886.64) | Asthma-dominant |
| Malta | 1270.51 (1140.12, 1387.85) | 277.01 (175.64, 410.31) | Asthma-dominant |
| Marshall Islands | 6518.18 (5093.82, 8205.42) | 545.59 (382.42, 720.22) | Consistent |
| Mauritania | 2126.35 (1570.63, 2744.37) | 368.78 (276.28, 479.27) | Consistent |
| Mauritius | 2089.12 (1952.72, 2175.06) | 250.73 (207.55, 309.78) | Consistent |
| Mexico | 2125.69 (1892.12, 2373.05) | 121.93 (84.91, 172.82) | IHD-dominant |
| Micronesia (Federated States of) | 6279.72 (4925.69, 8031.96) | 531.54 (410.82, 680.51) | Consistent |
| Monaco | 900.15 (731.12, 1090.66) | 243.68 (151.64, 370.89) | Asthma-dominant |
| Mongolia | 3892.31 (3366.09, 4387.10) | 148.60 (113.00, 191.46) | IHD-dominant |
| Montenegro | 3538.19 (3127.13, 3990.74) | 149.12 (93.82, 218.83) | IHD-dominant |
| Morocco | 5211.80 (3980.80, 6188.35) | 301.80 (244.42, 370.99) | IHD-dominant |
| Mozambique | 1060.36 (811.04, 1321.95) | 428.25 (314.79, 581.89) | Asthma-dominant |
| Myanmar | 2773.11 (2241.08, 3446.11) | 657.35 (511.79, 829.16) | Asthma-dominant |
| Namibia | 2109.10 (1621.51, 2684.92) | 504.93 (385.08, 683.12) | Asthma-dominant |
| Nauru | 10681.95 (8619.33, 13238.75) | 597.36 (415.23, 832.42) | Consistent |
| Nepal | 2890.07 (2320.57, 3596.09) | 604.71 (430.19, 869.96) | Asthma-dominant |
| Netherlands | 633.61 (573.46, 675.33) | 265.93 (169.07, 388.93) | Asthma-dominant |
| New Zealand | 1048.58 (948.57, 1108.69) | 349.05 (241.93, 503.09) | Asthma-dominant |
| Nicaragua | 1524.24 (1300.65, 1784.47) | 201.68 (137.18, 286.54) | IHD-dominant |
| Niger | 1413.47 (999.77, 1956.91) | 458.02 (329.55, 635.17) | Asthma-dominant |
| Nigeria | 2031.49 (1637.96, 2451.09) | 353.80 (282.83, 447.69) | Asthma-dominant |
| Niue | 5269.82 (4331.65, 6254.32) | 347.45 (268.83, 442.64) | IHD-dominant |
| North Macedonia | 3156.91 (2698.20, 3663.31) | 261.39 (180.67, 362.67) | IHD-dominant |
| Northern Mariana Islands | 3338.98 (2926.76, 3574.47) | 195.59 (162.79, 235.45) | IHD-dominant |
| Norway | 698.31 (633.77, 740.70) | 255.70 (167.16, 375.30) | Asthma-dominant |
| Oman | 3393.69 (2837.02, 4065.11) | 224.76 (162.72, 297.31) | IHD-dominant |
| Pakistan | 4069.01 (3417.01, 4985.77) | 344.19 (238.42, 609.61) | IHD-dominant |
| Palau | 5232.97 (4330.71, 6240.48) | 533.76 (436.64, 653.44) | Consistent |
| Palestine | 3458.69 (3014.40, 3871.78) | 217.49 (161.90, 284.57) | IHD-dominant |
| Panama | 1097.33 (870.20, 1306.77) | 211.52 (139.68, 310.29) | Asthma-dominant |
| Papua New Guinea | 3369.29 (2518.53, 4367.45) | 965.84 (667.67, 1486.67) | Consistent |
| Paraguay | 1786.15 (1391.01, 2223.94) | 247.08 (164.71, 361.93) | Consistent |
| Peru | 916.07 (723.47, 1141.69) | 206.20 (129.27, 314.62) | Asthma-dominant |
| Philippines | 3326.47 (2831.63, 3850.53) | 528.92 (444.58, 628.83) | Consistent |
| Poland | 1991.47 (1811.44, 2148.09) | 384.91 (251.39, 567.25) | Asthma-dominant |
| Portugal | 720.75 (663.52, 762.18) | 386.79 (246.16, 572.89) | Asthma-dominant |
| Puerto Rico | 1139.29 (955.18, 1324.13) | 449.12 (295.35, 657.35) | Asthma-dominant |
| Qatar | 2139.49 (1690.41, 2627.18) | 177.04 (126.47, 243.22) | IHD-dominant |
| Republic of Korea | 470.99 (402.59, 526.79) | 158.00 (112.42, 216.56) | Consistent |
| Republic of Moldova | 4379.75 (4010.89, 4794.82) | 117.88 (75.97, 172.15) | IHD-dominant |
| Romania | 2837.96 (2575.38, 3113.27) | 192.24 (123.06, 277.68) | IHD-dominant |
| Russian Federation | 4082.19 (3760.50, 4389.11) | 111.02 (74.15, 160.58) | IHD-dominant |
| Rwanda | 1306.89 (923.91, 1754.34) | 620.69 (454.41, 884.89) | Asthma-dominant |
| Saint Kitts and Nevis | 1718.25 (1451.68, 2018.72) | 270.24 (183.35, 392.58) | Consistent |
| Saint Lucia | 922.07 (770.21, 1080.92) | 379.55 (280.53, 521.15) | Asthma-dominant |
| Saint Vincent and the Grenadines | 1822.04 (1633.37, 2020.96) | 313.44 (232.91, 431.70) | Asthma-dominant |
| Samoa | 4993.89 (4206.29, 6087.24) | 431.36 (344.21, 568.39) | Consistent |
| San Marino | 429.12 (298.92, 591.84) | 243.42 (154.79, 364.13) | Asthma-dominant |
| Sao Tome and Principe | 2006.42 (1715.18, 2352.64) | 679.83 (503.20, 856.25) | Asthma-dominant |
| Saudi Arabia | 4219.77 (3530.63, 5082.93) | 258.07 (203.07, 324.48) | IHD-dominant |
| Senegal | 2346.78 (1836.03, 2939.94) | 357.94 (280.02, 464.48) | Consistent |
| Serbia | 2952.02 (2558.27, 3364.12) | 163.69 (113.69, 227.20) | IHD-dominant |
| Seychelles | 1807.80 (1629.13, 2020.44) | 203.28 (162.50, 253.24) | IHD-dominant |
| Sierra Leone | 2597.78 (1984.64, 3281.59) | 427.15 (313.14, 584.81) | Asthma-dominant |
| Singapore | 934.09 (866.47, 985.49) | 139.99 (89.39, 203.80) | Consistent |
| Slovakia | 3080.71 (2709.50, 3443.39) | 131.11 (83.71, 192.84) | IHD-dominant |
| Slovenia | 822.83 (715.65, 920.55) | 217.96 (138.14, 318.94) | Asthma-dominant |
| Solomon Islands | 6228.54 (5006.15, 7901.08) | 484.18 (368.62, 649.88) | Consistent |
| Somalia | 1549.45 (1070.27, 2167.12) | 664.85 (461.32, 899.33) | Asthma-dominant |
| South Africa | 1568.46 (1435.50, 1705.97) | 366.78 (327.34, 411.93) | Asthma-dominant |
| South Sudan | 1783.57 (1308.71, 2389.28) | 536.77 (387.89, 738.90) | Asthma-dominant |
| Spain | 678.71 (620.16, 718.29) | 187.02 (122.28, 264.80) | Consistent |
| Sri Lanka | 1963.57 (1330.01, 2662.39) | 297.95 (217.38, 387.85) | Asthma-dominant |
| Sudan | 5338.32 (4083.70, 7066.87) | 358.10 (259.93, 495.62) | IHD-dominant |
| Suriname | 2036.82 (1594.71, 2533.57) | 294.18 (219.81, 400.62) | Asthma-dominant |
| Sweden | 860.82 (751.70, 958.42) | 309.07 (199.01, 459.17) | Asthma-dominant |
| Switzerland | 639.19 (566.36, 688.50) | 235.15 (149.88, 345.03) | Asthma-dominant |
| Syrian Arab Republic | 6688.80 (5230.44, 8518.87) | 370.62 (293.87, 466.79) | IHD-dominant |
| Taiwan (Province of China) | 684.68 (626.58, 728.31) | 215.80 (145.14, 328.44) | Asthma-dominant |
| Tajikistan | 4400.38 (3740.14, 5106.84) | 212.47 (156.80, 273.42) | IHD-dominant |
| Thailand | 1039.67 (825.63, 1278.93) | 218.38 (165.91, 289.80) | Asthma-dominant |
| Timor-Leste | 3162.99 (2433.53, 4007.89) | 471.10 (363.16, 594.72) | Asthma-dominant |
| Togo | 2348.16 (1747.13, 3034.40) | 458.37 (349.01, 632.54) | Asthma-dominant |
| Tokelau | 4491.08 (3546.59, 5579.27) | 362.50 (250.09, 517.02) | IHD-dominant |
| Tonga | 3065.33 (2467.28, 3781.66) | 359.83 (284.90, 448.94) | Consistent |
| Trinidad and Tobago | 2270.93 (1754.62, 2870.76) | 233.59 (177.60, 314.02) | IHD-dominant |
| Tunisia | 3036.73 (2267.13, 4065.15) | 245.77 (185.17, 321.42) | IHD-dominant |
| Turkmenistan | 6512.70 (5219.52, 8027.65) | 118.06 (86.09, 159.07) | IHD-dominant |
| Tuvalu | 6200.06 (5251.54, 7307.55) | 442.84 (312.16, 604.38) | Consistent |
| Türkiye | 2419.28 (2008.07, 2856.99) | 249.07 (176.85, 341.97) | IHD-dominant |
| Uganda | 1490.00 (1191.54, 1887.39) | 448.34 (319.33, 669.51) | Asthma-dominant |
| Ukraine | 6522.69 (5003.40, 8125.67) | 123.90 (76.23, 182.57) | IHD-dominant |
| United Arab Emirates | 2923.67 (2395.62, 3422.00) | 453.38 (335.53, 607.46) | Asthma-dominant |
| United Kingdom | 983.93 (921.73, 1021.77) | 427.66 (282.71, 620.14) | Asthma-dominant |
| United Republic of Tanzania | 2051.06 (1526.60, 2613.31) | 441.48 (318.20, 608.11) | Asthma-dominant |
| United States Virgin Islands | 1953.39 (1594.10, 2390.09) | 324.89 (216.87, 474.63) | Asthma-dominant |
| United States of America | 1527.33 (1412.25, 1595.15) | 430.32 (292.27, 627.16) | Asthma-dominant |
| Uruguay | 1196.72 (1130.23, 1250.88) | 254.36 (179.47, 357.25) | Asthma-dominant |
| Uzbekistan | 6218.80 (5449.76, 7058.07) | 237.06 (181.75, 307.13) | IHD-dominant |
| Vanuatu | 7189.70 (6037.23, 8411.26) | 640.79 (449.50, 1119.74) | Consistent |
| Venezuela (Bolivarian Republic of) | 2941.77 (2286.73, 3718.26) | 198.86 (135.40, 289.58) | IHD-dominant |
| Viet Nam | 1464.59 (1198.70, 1740.50) | 283.09 (213.03, 350.61) | Consistent |
| Yemen | 5442.56 (4100.16, 7104.85) | 460.95 (361.58, 596.39) | Consistent |
| Zambia | 1937.07 (1461.43, 2469.87) | 339.07 (252.55, 480.70) | Asthma-dominant |
| Zimbabwe | 2404.18 (1938.12, 3035.67) | 698.41 (530.03, 884.64) | Asthma-dominant |

Table S2. Countries and territories at each risk index levels

| Risk index | Country or territory | The number of countries or territories |
| --- | --- | --- |
| 7 | Canada, Greenland, Netherlands | 3 |
| 9 | Andorra, Denmark, Iceland, Republic of Korea, Sweden | 5 |
| 10 | Germany, Monaco | 2 |
| 11 | Austria, Belgium, Israel, Japan, Singapore, Switzerland | 6 |
| 12 | Australia, France, Ireland, Italy, Norway, San Marino, Taiwan (Province of China), United Kingdom | 8 |
| 13 | Luxembourg, New Zealand, Spain, United States of America, United States Virgin Islands | 5 |
| 14 | Barbados, Bermuda, Chile, Czechia, Peru, Rwanda, Trinidad and Tobago | 7 |
| 15 | Bolivia (Plurinational State of), Colombia, Dominican Republic, Ecuador, Kenya, Malta, Portugal, Suriname, Uganda | 9 |
| 16 | Antigua and Barbuda, Belize, Finland, Greece, Jamaica, Philippines, Puerto Rico, Slovakia, Thailand | 9 |
| 17 | Bahamas, Brunei Darussalam, China, Cyprus, Latvia, Lithuania, Panama, Qatar, Saint Vincent and the Grenadines, Slovenia, United Republic of Tanzania, Uruguay, Viet Nam | 13 |
| 18 | Angola, Brazil, Cook Islands, Cuba, Democratic People's Republic of Korea, Dominica, Estonia, Ghana, Palau, Sri Lanka | 10 |
| 19 | Belarus, Bulgaria, Cabo Verde, Congo, Croatia, El Salvador, Eritrea, Guam, Kuwait, Maldives, Mauritius, Poland, Ukraine | 13 |
| 20 | Argentina, Bahrain, Benin, Bhutan, Comoros, Costa Rica, Ethiopia, Grenada, Guinea-Bissau, Guyana, Hungary, Indonesia, Lebanon, Madagascar, Malawi, Northern Mariana Islands, Paraguay, Romania, Saint Kitts and Nevis, Senegal, Seychelles, Somalia, South Sudan, United Arab Emirates, Zambia | 25 |
| 21 | Burundi, Fiji, Guinea, Iran (Islamic Republic of), Malaysia, Mozambique, Niger, Russian Federation, Saint Lucia, Sierra Leone, Türkiye, Venezuela (Bolivarian Republic of) | 12 |
| 22 | Burkina Faso, Gambia, Guatemala, Lao People's Democratic Republic, Mexico, Nigeria, Niue, Papua New Guinea, Sao Tome and Principe, Serbia, Togo, Tunisia | 12 |
| 23 | Albania, Bosnia and Herzegovina, Cambodia, Democratic Republic of the Congo, Djibouti, Eswatini, Gabon, Haiti, Honduras, Jordan, Kazakhstan, Kyrgyzstan, Lesotho, Montenegro, Myanmar, Nicaragua, Republic of Moldova, South Africa, Tokelau, Zimbabwe | 20 |
| 24 | Armenia, Botswana, Cameroon, Côte d'Ivoire, Nepal, North Macedonia, Solomon Islands, Turkmenistan | 8 |
| 25 | Algeria, American Samoa, Azerbaijan, Central African Republic, Chad, India, Marshall Islands, Micronesia (Federated States of), Oman, Samoa, Saudi Arabia, Timor-Leste, Tonga, Tuvalu | 14 |
| 26 | Egypt, Liberia, Libya, Mali, Mauritania, Mongolia, Morocco, Namibia, Nauru, Palestine, Syrian Arab Republic, Tajikistan, Uzbekistan, Vanuatu | 14 |
| 27 | Bangladesh, Equatorial Guinea, Kiribati | 3 |
| 28 | Georgia, Iraq, Yemen | 3 |
| 30 | Afghanistan, Sudan | 2 |
| 33 | Pakistan | 1 |

Table S3 Population attributable fractions for asthma and IHD of various risk factors by locations

|  | Asthma | | | | | | IHD | | | | | | | | | | |
| --- | --- | --- | --- | --- | --- | --- | --- | --- | --- | --- | --- | --- | --- | --- | --- | --- | --- |
| location | All risk | Diet low in omega-6 polyunsaturated fatty acids | Iron deficiency | Diet low in vegetables | Household air pollution from solid fuels | Lead exposure | All risk | Diet low in omega-6 polyunsaturated fatty acids | Iron deficiency | Diet low in nuts and seeds | Diet low in whole grains | High body-mass index | High fasting plasma glucose | High systolic blood pressure | High temperature | Kidney dysfunction | Secondhand smoke |
| Global | 28.963 | 10.128 | 2.241 | 9.365 | 5.543 | 5.555 | 43.083 | 15.526 | 2.033 | 2.922 | 7.638 | 3.485 | 3.070 | 3.573 | 6.034 | 0.967 | 8.626 |
| GBD regions |  |  |  |  |  |  |  |  |  |  |  |  |  |  |  |  |  |
| Central Sub-Saharan Africa | 44.815 | 11.231 | 2.334 | 20.321 | 14.863 | 6.168 | 38.906 | 17.105 | 2.118 | 1.289 | 7.343 | 2.678 | 3.322 | 3.674 | 3.123 | 1.365 | 4.942 |
| Eastern Sub-Saharan Africa | 45.292 | 11.336 | 2.547 | 18.383 | 17.475 | 5.997 | 37.485 | 17.254 | 2.311 | 2.906 | 5.912 | 2.246 | 1.401 | 3.802 | 3.521 | 0.689 | 4.707 |
| Western Sub-Saharan Africa | 38.917 | 11.470 | 3.219 | 13.749 | 11.803 | 6.281 | 40.288 | 17.444 | 2.923 | 0.410 | 6.893 | 2.938 | 2.122 | 4.627 | 6.445 | 1.217 | 4.039 |
| Southern Sub-Saharan Africa | 32.114 | 9.322 | 2.676 | 15.148 | 4.286 | 5.283 | 41.296 | 14.359 | 2.429 | 5.058 | 5.046 | 4.892 | 2.293 | 4.766 | 2.704 | 1.354 | 8.255 |
| North Africa and Middle East | 23.934 | 10.068 | 2.071 | 5.866 | 1.801 | 6.565 | 49.514 | 15.439 | 1.878 | 2.696 | 10.423 | 6.155 | 3.971 | 3.784 | 9.711 | 1.026 | 9.906 |
| South Asia | 38.152 | 11.315 | 3.698 | 13.808 | 9.162 | 7.507 | 46.426 | 17.224 | 3.359 | 5.057 | 7.159 | 1.902 | 3.431 | 3.302 | 8.737 | 1.087 | 8.120 |
| Southeast Asia | 30.697 | 11.237 | 1.937 | 12.131 | 4.683 | 4.938 | 39.824 | 17.113 | 1.757 | 0.518 | 4.721 | 2.122 | 2.128 | 3.944 | 3.955 | 1.186 | 10.723 |
| East Asia | 19.602 | 10.764 | 1.095 | 1.344 | 2.111 | 5.676 | 45.139 | 16.438 | 0.992 | 2.588 | 8.042 | 3.113 | 3.252 | 3.384 | 5.400 | 0.718 | 12.970 |
| Central Asia | 20.263 | 11.015 | 2.533 | 2.421 | 2.031 | 3.830 | 49.772 | 16.797 | 2.298 | 5.419 | 10.101 | 4.269 | 2.336 | 4.501 | 8.413 | 1.518 | 9.766 |
| Oceania | 37.578 | 11.072 | 2.369 | 14.351 | 13.627 | 2.813 | 44.379 | 16.878 | 2.149 | 1.974 | 8.696 | 3.948 | 4.561 | 2.502 | 2.636 | 0.970 | 11.340 |
| Australasia | 24.024 | 10.813 | 1.005 | 10.247 | 0.003 | 4.121 | 40.375 | 16.508 | 0.911 | 1.096 | 8.132 | 5.964 | 2.941 | 2.959 | 2.974 | 0.786 | 6.969 |
| Caribbean | 32.216 | 7.707 | 2.388 | 14.331 | 5.742 | 6.822 | 36.487 | 11.986 | 2.167 | 1.098 | 7.874 | 4.433 | 3.651 | 3.618 | 2.907 | 0.828 | 5.265 |
| Central Latin America | 27.886 | 9.818 | 1.332 | 12.526 | 1.524 | 5.916 | 40.600 | 15.079 | 1.207 | 3.492 | 6.484 | 5.706 | 3.976 | 3.485 | 3.682 | 1.220 | 5.647 |
| Andean Latin America | 28.622 | 9.823 | 1.713 | 13.707 | 1.263 | 5.482 | 37.272 | 15.085 | 1.553 | 3.360 | 6.982 | 5.356 | 2.327 | 2.572 | 2.771 | 0.722 | 3.983 |
| Tropical Latin America | 24.166 | 4.828 | 1.944 | 13.653 | 0.789 | 5.142 | 33.809 | 7.641 | 1.763 | 0.267 | 7.383 | 5.120 | 3.531 | 3.690 | 3.005 | 1.024 | 6.673 |
| Southern Latin America | 22.964 | 9.730 | 1.476 | 9.972 | 0.125 | 3.668 | 45.022 | 14.951 | 1.338 | 6.224 | 9.313 | 5.734 | 2.908 | 3.450 | 3.174 | 0.672 | 9.348 |
| Central Europe | 19.819 | 10.391 | 1.553 | 5.218 | 0.363 | 3.758 | 45.365 | 15.903 | 1.408 | 4.199 | 8.457 | 4.645 | 2.831 | 4.601 | 4.549 | 0.829 | 10.200 |
| Eastern Europe | 22.046 | 10.827 | 1.472 | 8.087 | 0.158 | 3.316 | 45.559 | 16.529 | 1.334 | 4.489 | 8.421 | 4.693 | 1.954 | 4.664 | 4.886 | 1.061 | 9.854 |
| Western Europe | 20.536 | 8.947 | 1.158 | 8.608 | 0.002 | 3.387 | 39.508 | 13.812 | 1.050 | 2.367 | 8.427 | 4.476 | 2.511 | 3.640 | 3.030 | 0.763 | 8.128 |
| High-income Asia Pacific | 16.795 | 8.556 | 1.250 | 5.228 | 0.003 | 2.771 | 38.594 | 13.240 | 1.133 | 3.584 | 7.089 | 2.654 | 2.776 | 2.948 | 4.390 | 0.932 | 8.147 |
| High-income North America | 16.165 | 3.967 | 1.027 | 9.311 | 0.001 | 2.740 | 34.953 | 6.311 | 0.931 | 0.495 | 8.458 | 6.538 | 4.339 | 2.614 | 5.229 | 1.061 | 5.761 |
| 204 countries and territories |  |  |  |  |  |  |  |  |  |  |  |  |  |  |  |  |  |
| Afghanistan | 49.379 | 11.485 | 2.108 | 21.741 | 16.946 | 10.119 | 48.589 | 17.465 | 1.912 | 4.048 | 10.912 | 3.525 | 4.091 | 3.320 | 9.374 | 1.035 | 7.406 |
| Albania | 19.350 | 11.250 | 1.731 | 1.157 | 1.613 | 4.911 | 48.024 | 17.131 | 1.570 | 3.177 | 10.401 | 4.574 | 1.865 | 5.678 | 4.975 | 0.808 | 11.777 |
| Algeria | 24.676 | 9.957 | 2.064 | 9.267 | 0.013 | 5.848 | 51.352 | 15.278 | 1.872 | 4.868 | 10.959 | 5.255 | 4.207 | 3.288 | 10.760 | 0.972 | 10.943 |
| American Samoa | 29.327 | 10.920 | 2.053 | 17.100 | 0.400 | 1.900 | 49.118 | 16.661 | 1.862 | 0.241 | 9.835 | 9.886 | 8.401 | 4.334 | 1.220 | 1.167 | 10.283 |
| Andorra | 18.798 | 8.117 | 1.090 | 7.780 | 0.000 | 3.112 | 37.691 | 12.593 | 0.988 | 1.439 | 8.609 | 4.309 | 2.712 | 4.082 | 1.095 | 0.785 | 8.782 |
| Angola | 31.547 | 10.120 | 2.207 | 12.934 | 5.076 | 5.769 | 37.154 | 15.514 | 2.002 | 2.376 | 6.240 | 2.874 | 2.253 | 4.239 | 3.108 | 1.311 | 4.608 |
| Antigua and Barbuda | 23.412 | 6.274 | 1.845 | 13.039 | 0.022 | 4.245 | 37.175 | 9.843 | 1.673 | 2.530 | 9.941 | 5.342 | 3.739 | 3.664 | 2.382 | 0.884 | 4.940 |
| Argentina | 23.931 | 9.849 | 1.614 | 10.677 | 0.076 | 3.911 | 46.285 | 15.123 | 1.463 | 7.288 | 9.515 | 5.525 | 2.893 | 3.550 | 3.949 | 0.651 | 9.329 |
| Armenia | 16.572 | 10.972 | 2.032 | 0.142 | 0.352 | 3.872 | 50.207 | 16.736 | 1.843 | 5.645 | 10.148 | 4.371 | 2.165 | 4.336 | 6.217 | 1.415 | 13.159 |
| Australia | 24.134 | 10.937 | 1.016 | 10.268 | 0.003 | 4.092 | 40.375 | 16.686 | 0.921 | 1.112 | 7.987 | 5.961 | 2.837 | 2.940 | 3.124 | 0.778 | 6.875 |
| Austria | 22.046 | 10.459 | 1.109 | 9.140 | 0.002 | 3.107 | 40.381 | 16.001 | 1.005 | 1.279 | 6.571 | 3.915 | 1.683 | 4.073 | 3.932 | 0.803 | 9.986 |
| Azerbaijan | 17.963 | 11.258 | 2.291 | 1.552 | 0.277 | 3.629 | 49.756 | 17.143 | 2.078 | 3.515 | 10.199 | 4.573 | 2.405 | 4.346 | 6.874 | 1.521 | 12.518 |
| Bahamas | 21.016 | 7.177 | 1.944 | 10.308 | 0.015 | 3.235 | 39.061 | 11.198 | 1.763 | 1.452 | 9.875 | 6.211 | 4.161 | 3.785 | 3.532 | 0.858 | 4.912 |
| Bahrain | 18.806 | 9.301 | 1.475 | 4.753 | 0.003 | 4.602 | 51.242 | 14.329 | 1.337 | 1.328 | 10.894 | 7.790 | 4.836 | 4.018 | 13.568 | 0.987 | 8.977 |
| Bangladesh | 46.375 | 11.139 | 2.806 | 20.351 | 15.533 | 7.711 | 45.891 | 16.974 | 2.547 | 6.031 | 5.646 | 1.688 | 3.374 | 3.613 | 6.908 | 0.967 | 10.648 |
| Barbados | 25.316 | 9.175 | 1.777 | 12.963 | 0.005 | 3.811 | 37.994 | 14.145 | 1.611 | 0.277 | 9.043 | 6.164 | 4.451 | 3.790 | 2.201 | 0.830 | 3.270 |
| Belarus | 18.865 | 10.659 | 1.411 | 4.155 | 0.027 | 3.867 | 46.008 | 16.288 | 1.279 | 4.223 | 9.259 | 4.378 | 1.433 | 5.417 | 4.394 | 1.136 | 10.784 |
| Belgium | 18.616 | 6.946 | 0.976 | 6.822 | 0.001 | 5.211 | 36.320 | 10.853 | 0.885 | 1.518 | 8.364 | 4.153 | 2.469 | 4.334 | 2.544 | 0.792 | 7.637 |
| Belize | 27.998 | 8.353 | 2.130 | 14.724 | 1.598 | 4.336 | 37.813 | 12.940 | 1.932 | 0.319 | 7.142 | 6.107 | 3.314 | 3.148 | 4.634 | 0.917 | 5.283 |
| Benin | 39.767 | 11.540 | 2.928 | 11.949 | 15.326 | 5.918 | 38.201 | 17.542 | 2.658 | 0.607 | 5.348 | 3.012 | 1.826 | 4.389 | 6.099 | 1.056 | 3.243 |
| Bermuda | 21.672 | 9.150 | 1.454 | 10.096 | 0.008 | 2.680 | 40.532 | 14.108 | 1.318 | 1.765 | 10.028 | 6.751 | 3.857 | 2.689 | 2.743 | 0.735 | 5.752 |
| Bhutan | 33.445 | 11.092 | 4.476 | 12.911 | 2.210 | 7.983 | 40.225 | 16.906 | 4.069 | 3.558 | 5.888 | 3.186 | 2.483 | 3.082 | 2.831 | 1.157 | 5.989 |
| Bolivia (Plurinational State of) | 32.032 | 9.039 | 2.297 | 15.890 | 2.946 | 6.314 | 36.804 | 13.946 | 2.084 | 0.375 | 7.217 | 5.111 | 2.644 | 2.280 | 4.298 | 0.769 | 5.356 |
| Bosnia and Herzegovina | 23.076 | 11.104 | 1.653 | 5.152 | 2.351 | 5.001 | 46.607 | 16.923 | 1.499 | 4.597 | 6.462 | 4.573 | 2.931 | 4.871 | 5.227 | 0.822 | 11.723 |
| Botswana | 32.860 | 10.805 | 2.289 | 16.938 | 1.332 | 6.001 | 43.521 | 16.497 | 2.077 | 6.071 | 5.824 | 3.908 | 1.962 | 4.815 | 4.152 | 1.333 | 7.923 |
| Brazil | 24.084 | 4.824 | 1.953 | 13.610 | 0.732 | 5.137 | 33.757 | 7.634 | 1.771 | 0.231 | 7.390 | 5.126 | 3.545 | 3.680 | 2.963 | 1.023 | 6.657 |
| Brunei Darussalam | 26.148 | 11.412 | 1.255 | 12.538 | 0.005 | 3.466 | 40.163 | 17.362 | 1.138 | 0.900 | 6.791 | 3.642 | 4.202 | 3.368 | 2.737 | 1.151 | 7.543 |
| Bulgaria | 15.981 | 8.378 | 1.720 | 2.691 | 0.408 | 3.721 | 43.992 | 12.977 | 1.560 | 3.205 | 8.772 | 4.573 | 2.550 | 4.754 | 5.311 | 0.868 | 10.948 |
| Burkina Faso | 47.858 | 11.561 | 3.661 | 20.293 | 15.998 | 8.597 | 40.935 | 17.573 | 3.326 | 0.751 | 6.427 | 1.791 | 1.691 | 3.167 | 8.471 | 1.021 | 5.766 |
| Burundi | 48.939 | 11.560 | 2.614 | 20.236 | 20.407 | 6.618 | 38.946 | 17.572 | 2.372 | 7.055 | 7.319 | 1.306 | 1.303 | 4.010 | 1.468 | 0.696 | 3.732 |
| Cabo Verde | 26.476 | 9.367 | 2.407 | 9.716 | 2.806 | 5.272 | 36.648 | 14.423 | 2.184 | 0.943 | 6.933 | 3.486 | 3.575 | 5.551 | 0.894 | 1.003 | 4.803 |
| Cambodia | 42.982 | 11.476 | 2.478 | 18.811 | 13.451 | 6.009 | 37.778 | 17.453 | 2.248 | 0.967 | 3.426 | 1.213 | 1.521 | 2.016 | 3.802 | 1.090 | 11.107 |
| Cameroon | 37.436 | 11.561 | 2.397 | 11.021 | 12.294 | 7.125 | 41.084 | 17.573 | 2.175 | 0.034 | 6.291 | 4.715 | 2.489 | 5.222 | 6.330 | 1.440 | 4.063 |
| Canada | 21.853 | 10.882 | 1.387 | 8.513 | 0.001 | 2.803 | 38.777 | 16.606 | 1.257 | 0.347 | 6.339 | 5.310 | 2.081 | 2.332 | 4.068 | 0.760 | 7.604 |
| Central African Republic | 49.986 | 11.560 | 2.764 | 22.108 | 19.419 | 7.342 | 40.608 | 17.571 | 2.509 | 0.356 | 7.964 | 2.585 | 3.569 | 3.959 | 5.356 | 1.364 | 4.315 |
| Chad | 48.237 | 11.560 | 3.417 | 21.067 | 15.597 | 9.039 | 43.883 | 17.572 | 3.104 | 1.622 | 10.007 | 1.753 | 2.125 | 3.351 | 9.489 | 1.034 | 4.670 |
| Chile | 20.426 | 9.836 | 1.129 | 7.910 | 0.256 | 2.821 | 42.760 | 15.104 | 1.023 | 3.938 | 8.825 | 6.411 | 3.026 | 3.211 | 1.366 | 0.702 | 9.597 |
| China | 19.351 | 10.944 | 1.079 | 1.118 | 1.822 | 5.700 | 45.339 | 16.696 | 0.977 | 2.540 | 8.071 | 3.108 | 3.267 | 3.418 | 5.390 | 0.713 | 13.022 |
| Colombia | 25.648 | 10.209 | 1.222 | 11.817 | 0.499 | 4.460 | 38.934 | 15.643 | 1.107 | 3.649 | 6.533 | 4.508 | 2.643 | 3.196 | 3.785 | 1.095 | 5.091 |
| Comoros | 45.213 | 11.546 | 2.627 | 20.608 | 15.654 | 5.011 | 38.834 | 17.552 | 2.384 | 2.082 | 5.760 | 3.926 | 1.454 | 4.162 | 1.489 | 0.689 | 7.223 |
| Congo | 39.709 | 11.268 | 2.479 | 21.133 | 7.586 | 4.404 | 38.095 | 17.157 | 2.249 | 0.551 | 6.088 | 3.642 | 2.496 | 4.531 | 2.316 | 1.356 | 5.298 |
| Cook Islands | 26.987 | 10.578 | 1.780 | 15.265 | 0.052 | 1.844 | 47.999 | 16.172 | 1.614 | 0.071 | 9.755 | 10.246 | 8.552 | 3.776 | 1.648 | 0.983 | 9.100 |
| Costa Rica | 27.441 | 8.174 | 1.619 | 14.734 | 0.283 | 5.535 | 39.241 | 12.677 | 1.468 | 2.987 | 8.257 | 5.573 | 3.576 | 4.168 | 2.358 | 1.470 | 5.485 |
| Côte d'Ivoire | 39.967 | 11.558 | 2.899 | 15.217 | 11.752 | 6.568 | 40.070 | 17.569 | 2.631 | 0.141 | 7.119 | 2.857 | 2.261 | 4.913 | 3.889 | 1.071 | 6.218 |
| Croatia | 21.730 | 8.296 | 1.417 | 9.971 | 0.093 | 3.745 | 44.403 | 12.857 | 1.285 | 3.093 | 8.233 | 5.026 | 2.652 | 4.905 | 5.512 | 0.789 | 11.821 |
| Cuba | 23.998 | 9.634 | 1.676 | 8.583 | 0.230 | 6.214 | 40.724 | 14.812 | 1.520 | 1.265 | 8.131 | 5.299 | 4.168 | 2.546 | 3.379 | 0.757 | 8.149 |
| Cyprus | 21.367 | 7.632 | 1.103 | 10.036 | 0.002 | 4.316 | 42.676 | 11.875 | 1.000 | 0.866 | 9.035 | 4.561 | 2.655 | 4.125 | 6.879 | 0.834 | 11.416 |
| Czechia | 23.790 | 10.697 | 1.411 | 10.781 | 0.013 | 2.968 | 42.516 | 16.342 | 1.279 | 3.098 | 6.553 | 4.648 | 2.955 | 4.401 | 3.125 | 0.764 | 9.616 |
| Democratic People's Republic of Korea | 35.364 | 8.835 | 1.783 | 8.697 | 16.272 | 5.571 | 44.066 | 13.649 | 1.616 | 7.219 | 6.493 | 2.358 | 2.654 | 2.540 | 6.138 | 0.819 | 12.000 |
| Democratic Republic of the Congo | 48.799 | 11.560 | 2.345 | 22.345 | 18.407 | 6.434 | 39.264 | 17.572 | 2.127 | 1.082 | 7.741 | 2.428 | 3.639 | 3.371 | 3.083 | 1.383 | 4.995 |
| Denmark | 21.204 | 9.865 | 1.206 | 8.378 | 0.001 | 3.421 | 39.085 | 15.146 | 1.093 | 2.294 | 8.307 | 4.385 | 2.012 | 4.317 | 1.907 | 0.795 | 7.132 |
| Djibouti | 31.517 | 10.897 | 2.447 | 12.954 | 4.208 | 5.512 | 48.072 | 16.629 | 2.221 | 4.937 | 7.562 | 2.219 | 1.410 | 4.351 | 11.659 | 0.686 | 10.393 |
| Dominica | 25.930 | 10.534 | 2.029 | 11.414 | 0.681 | 3.951 | 42.638 | 16.109 | 1.841 | 0.547 | 11.245 | 6.498 | 4.735 | 3.892 | 1.998 | 0.951 | 5.035 |
| Dominican Republic | 23.255 | 3.404 | 1.979 | 12.218 | 0.365 | 7.327 | 29.083 | 5.434 | 1.795 | 0.710 | 6.890 | 4.545 | 2.776 | 3.537 | 2.339 | 0.839 | 4.724 |
| Ecuador | 26.431 | 8.304 | 1.059 | 14.968 | 0.505 | 4.152 | 37.513 | 12.868 | 0.959 | 4.865 | 8.401 | 5.825 | 3.222 | 2.451 | 1.750 | 0.792 | 4.114 |
| Egypt | 20.608 | 11.105 | 1.920 | 0.274 | 0.017 | 8.676 | 49.772 | 16.925 | 1.741 | 2.802 | 6.986 | 7.542 | 2.883 | 4.278 | 10.198 | 1.030 | 10.903 |
| El Salvador | 30.137 | 10.874 | 1.275 | 12.138 | 2.026 | 7.762 | 38.815 | 16.596 | 1.156 | 0.639 | 6.595 | 5.615 | 3.293 | 3.516 | 3.538 | 1.122 | 4.797 |
| Equatorial Guinea | 34.890 | 11.382 | 2.161 | 21.024 | 0.235 | 4.690 | 44.241 | 17.319 | 1.961 | 0.059 | 8.179 | 5.596 | 5.477 | 4.809 | 2.064 | 1.339 | 8.670 |
| Eritrea | 43.908 | 11.442 | 2.955 | 19.722 | 14.220 | 5.220 | 40.145 | 17.404 | 2.683 | 3.021 | 5.329 | 1.239 | 1.234 | 2.996 | 9.242 | 0.688 | 4.898 |
| Estonia | 21.612 | 10.406 | 1.324 | 8.270 | 0.083 | 3.260 | 42.369 | 15.925 | 1.200 | 4.146 | 6.937 | 4.748 | 2.076 | 4.496 | 3.848 | 1.173 | 8.119 |
| Eswatini | 38.964 | 11.359 | 2.180 | 20.813 | 5.351 | 6.080 | 38.448 | 17.286 | 1.978 | 1.294 | 4.815 | 5.454 | 2.248 | 4.322 | 2.504 | 1.391 | 4.952 |
| Ethiopia | 46.929 | 11.408 | 2.406 | 19.548 | 18.197 | 6.732 | 38.041 | 17.356 | 2.183 | 5.185 | 7.389 | 1.482 | 1.262 | 2.920 | 3.587 | 0.668 | 3.487 |
| Fiji | 27.262 | 7.595 | 2.290 | 15.243 | 2.724 | 2.287 | 42.479 | 11.821 | 2.078 | 0.427 | 9.680 | 6.825 | 6.606 | 4.346 | 1.644 | 1.098 | 8.522 |
| Finland | 23.414 | 11.203 | 1.022 | 10.778 | 0.000 | 2.334 | 42.416 | 17.065 | 0.926 | 3.538 | 8.122 | 4.705 | 3.519 | 4.599 | 3.060 | 0.708 | 6.340 |
| France | 21.933 | 8.723 | 0.893 | 10.604 | 0.001 | 3.465 | 40.015 | 13.484 | 0.809 | 2.505 | 9.898 | 4.094 | 2.176 | 3.713 | 2.669 | 0.694 | 8.868 |
| Gabon | 33.651 | 11.441 | 2.778 | 19.505 | 0.383 | 3.898 | 41.715 | 17.403 | 2.521 | 0.175 | 7.351 | 5.004 | 5.037 | 4.249 | 1.987 | 1.363 | 6.271 |
| Gambia | 46.674 | 11.119 | 3.657 | 20.789 | 15.330 | 7.147 | 40.435 | 16.945 | 3.322 | 0.209 | 6.053 | 2.661 | 2.111 | 4.947 | 5.002 | 1.044 | 7.064 |
| Georgia | 26.667 | 11.048 | 2.092 | 8.810 | 1.804 | 5.966 | 48.767 | 16.843 | 1.897 | 3.815 | 9.662 | 4.485 | 1.981 | 4.711 | 5.666 | 1.467 | 12.838 |
| Germany | 20.914 | 8.779 | 1.414 | 9.511 | 0.001 | 2.815 | 38.042 | 13.566 | 1.282 | 1.309 | 6.565 | 4.585 | 2.643 | 3.803 | 3.299 | 0.805 | 8.132 |
| Ghana | 36.415 | 11.522 | 3.042 | 14.083 | 9.473 | 4.704 | 38.673 | 17.517 | 2.761 | 0.119 | 7.637 | 3.084 | 2.501 | 3.811 | 5.025 | 0.741 | 3.269 |
| Greece | 17.207 | 10.542 | 1.209 | 1.965 | 0.009 | 4.431 | 44.392 | 16.120 | 1.096 | 0.948 | 10.243 | 5.101 | 2.350 | 2.700 | 5.730 | 0.810 | 10.576 |
| Greenland | 16.342 | 7.129 | 1.111 | 6.343 | 0.001 | 2.737 | 36.311 | 11.126 | 1.007 | 0.379 | 6.182 | 5.367 | 1.707 | 2.553 | 3.902 | 0.895 | 10.278 |
| Grenada | 29.437 | 7.103 | 1.916 | 17.947 | 0.115 | 5.512 | 37.474 | 11.087 | 1.737 | 1.898 | 9.768 | 4.752 | 4.200 | 3.743 | 2.247 | 0.935 | 4.947 |
| Guam | 25.264 | 10.180 | 1.763 | 13.670 | 0.026 | 1.864 | 44.887 | 15.601 | 1.598 | 0.017 | 9.368 | 7.511 | 6.607 | 3.794 | 2.797 | 1.018 | 8.406 |
| Guatemala | 34.203 | 9.746 | 1.925 | 12.477 | 6.644 | 9.028 | 39.032 | 14.973 | 1.746 | 1.565 | 6.278 | 5.097 | 3.462 | 4.172 | 3.731 | 1.318 | 5.156 |
| Guinea | 44.275 | 11.507 | 3.095 | 15.944 | 15.983 | 7.985 | 39.161 | 17.496 | 2.810 | 0.498 | 5.859 | 2.251 | 2.010 | 4.291 | 5.064 | 1.062 | 5.934 |
| Guinea-Bissau | 47.376 | 11.205 | 3.453 | 21.055 | 16.072 | 7.355 | 37.246 | 17.067 | 3.136 | 0.358 | 5.186 | 2.372 | 2.134 | 4.355 | 4.581 | 1.094 | 4.125 |
| Guyana | 30.226 | 11.177 | 2.244 | 13.573 | 0.908 | 6.172 | 40.666 | 17.028 | 2.035 | 0.624 | 7.631 | 4.369 | 5.258 | 3.673 | 2.462 | 0.917 | 5.716 |
| Haiti | 48.764 | 9.633 | 3.485 | 21.443 | 17.177 | 9.711 | 37.423 | 14.811 | 3.166 | 1.796 | 7.248 | 2.316 | 3.141 | 4.887 | 3.193 | 0.908 | 3.530 |
| Honduras | 36.325 | 11.380 | 1.735 | 12.580 | 8.731 | 8.354 | 41.449 | 17.317 | 1.573 | 4.727 | 5.784 | 3.874 | 3.012 | 3.306 | 3.126 | 1.294 | 7.018 |
| Hungary | 19.767 | 9.323 | 1.484 | 6.283 | 0.219 | 3.952 | 45.906 | 14.361 | 1.346 | 5.230 | 8.199 | 5.288 | 2.697 | 5.169 | 6.092 | 0.786 | 9.618 |
| Iceland | 22.476 | 9.218 | 0.977 | 11.110 | 0.000 | 2.983 | 37.945 | 14.207 | 0.885 | 2.466 | 8.910 | 5.218 | 2.849 | 3.301 | 0.234 | 0.615 | 6.962 |
| India | 36.546 | 11.339 | 3.679 | 12.370 | 8.433 | 7.399 | 45.572 | 17.258 | 3.342 | 5.047 | 6.821 | 1.839 | 3.412 | 3.128 | 8.329 | 1.085 | 7.640 |
| Indonesia | 31.033 | 11.292 | 1.936 | 13.390 | 3.157 | 5.478 | 40.100 | 17.191 | 1.756 | 0.521 | 4.644 | 1.993 | 2.019 | 4.704 | 2.740 | 1.185 | 11.747 |
| Iran (Islamic Republic of) | 19.502 | 8.128 | 1.741 | 3.173 | 0.015 | 7.893 | 44.653 | 12.609 | 1.579 | 1.044 | 10.739 | 5.830 | 3.217 | 3.297 | 9.335 | 1.159 | 7.762 |
| Iraq | 21.749 | 9.965 | 1.867 | 5.838 | 0.047 | 5.900 | 56.738 | 15.291 | 1.693 | 6.817 | 11.521 | 6.204 | 6.790 | 4.851 | 13.600 | 1.046 | 11.404 |
| Ireland | 21.636 | 10.233 | 1.091 | 8.547 | 0.001 | 3.490 | 39.126 | 15.676 | 0.989 | 2.263 | 6.409 | 5.103 | 2.649 | 4.052 | 1.805 | 0.998 | 7.500 |
| Israel | 10.770 | 5.877 | 1.250 | 0.859 | 0.002 | 3.164 | 37.758 | 9.243 | 1.133 | 0.074 | 9.688 | 4.218 | 3.174 | 3.876 | 5.388 | 0.863 | 8.074 |
| Italy | 18.844 | 8.334 | 1.065 | 7.315 | 0.005 | 3.446 | 40.633 | 12.913 | 0.965 | 2.735 | 10.644 | 3.862 | 2.270 | 3.332 | 3.760 | 0.685 | 8.770 |
| Jamaica | 25.965 | 9.481 | 1.921 | 10.683 | 1.370 | 5.338 | 37.465 | 14.589 | 1.742 | 0.702 | 7.576 | 5.287 | 2.244 | 3.588 | 2.766 | 0.864 | 5.641 |
| Japan | 17.733 | 9.649 | 1.344 | 5.433 | 0.003 | 2.401 | 40.396 | 14.834 | 1.218 | 4.411 | 7.517 | 2.574 | 2.578 | 3.446 | 4.084 | 0.979 | 7.926 |
| Jordan | 22.666 | 8.067 | 1.966 | 9.471 | 0.006 | 5.210 | 47.083 | 12.520 | 1.783 | 1.532 | 11.902 | 6.893 | 4.919 | 3.569 | 4.638 | 1.001 | 11.907 |
| Kazakhstan | 16.820 | 10.131 | 2.225 | 2.318 | 0.115 | 2.979 | 49.026 | 15.530 | 2.018 | 4.301 | 9.936 | 4.236 | 2.377 | 5.350 | 8.882 | 1.484 | 10.039 |
| Kenya | 38.162 | 11.286 | 1.864 | 12.832 | 14.582 | 4.605 | 37.021 | 17.183 | 1.690 | 3.730 | 5.784 | 2.924 | 1.583 | 4.263 | 1.441 | 0.702 | 4.728 |
| Kiribati | 38.458 | 11.498 | 2.818 | 17.291 | 11.073 | 2.715 | 50.482 | 17.484 | 2.558 | 1.100 | 9.870 | 7.942 | 6.862 | 2.500 | 1.842 | 1.121 | 14.849 |
| Kuwait | 15.031 | 7.172 | 1.596 | 3.096 | 0.001 | 4.009 | 50.115 | 11.190 | 1.447 | 2.018 | 9.333 | 8.960 | 4.755 | 3.109 | 13.395 | 0.918 | 11.008 |
| Kyrgyzstan | 25.017 | 11.313 | 2.340 | 4.107 | 5.982 | 3.974 | 48.282 | 17.221 | 2.123 | 5.516 | 10.089 | 4.174 | 1.824 | 2.882 | 4.933 | 1.471 | 12.203 |
| Lao People's Democratic Republic | 36.204 | 11.556 | 2.216 | 11.155 | 10.988 | 6.724 | 41.006 | 17.565 | 2.010 | 1.399 | 3.934 | 1.581 | 2.154 | 3.458 | 4.971 | 1.230 | 11.642 |
| Latvia | 20.480 | 8.755 | 1.436 | 8.380 | 0.188 | 3.311 | 43.035 | 13.532 | 1.302 | 3.631 | 8.356 | 4.385 | 2.065 | 5.254 | 4.137 | 1.173 | 10.081 |
| Lebanon | 12.503 | 6.398 | 1.663 | 0.811 | 0.025 | 4.140 | 43.665 | 10.029 | 1.508 | 0.085 | 11.484 | 6.669 | 4.096 | 4.734 | 3.104 | 0.960 | 12.158 |
| Lesotho | 43.561 | 11.290 | 2.304 | 20.326 | 11.791 | 7.338 | 39.807 | 17.189 | 2.090 | 3.042 | 4.006 | 3.824 | 1.763 | 3.805 | 0.745 | 1.361 | 10.359 |
| Liberia | 48.518 | 11.470 | 2.874 | 21.536 | 17.378 | 7.645 | 40.149 | 17.443 | 2.608 | 2.669 | 7.029 | 4.066 | 3.014 | 4.817 | 2.164 | 1.058 | 4.042 |
| Libya | 20.781 | 6.872 | 1.888 | 8.602 | 0.027 | 5.113 | 49.738 | 10.742 | 1.712 | 2.729 | 9.927 | 7.247 | 3.535 | 5.480 | 10.359 | 1.012 | 12.863 |
| Lithuania | 20.599 | 9.518 | 1.438 | 7.964 | 0.036 | 3.227 | 41.836 | 14.644 | 1.303 | 3.580 | 7.356 | 4.145 | 1.707 | 5.630 | 3.851 | 1.158 | 8.531 |
| Luxembourg | 21.401 | 10.185 | 1.097 | 8.798 | 0.000 | 2.983 | 41.425 | 15.607 | 0.994 | 4.367 | 7.163 | 4.338 | 3.076 | 4.189 | 2.323 | 0.776 | 8.289 |
| Madagascar | 47.671 | 11.399 | 2.641 | 20.499 | 19.374 | 5.357 | 38.152 | 17.344 | 2.397 | 4.528 | 4.607 | 1.554 | 1.282 | 3.825 | 3.711 | 0.670 | 5.837 |
| Malawi | 47.858 | 11.504 | 3.030 | 19.932 | 19.209 | 6.069 | 37.785 | 17.492 | 2.751 | 1.001 | 4.270 | 2.894 | 1.236 | 4.176 | 4.900 | 0.721 | 5.708 |
| Malaysia | 26.916 | 10.229 | 1.915 | 13.030 | 0.016 | 4.547 | 42.955 | 15.670 | 1.737 | 0.067 | 7.700 | 4.052 | 3.797 | 5.586 | 3.224 | 1.295 | 10.347 |
| Maldives | 25.863 | 11.345 | 1.738 | 9.959 | 0.385 | 5.118 | 42.912 | 17.267 | 1.576 | 1.267 | 7.683 | 3.195 | 2.221 | 3.898 | 2.779 | 1.142 | 12.022 |
| Mali | 47.786 | 11.560 | 4.382 | 20.197 | 15.248 | 8.711 | 45.593 | 17.571 | 3.983 | 1.947 | 7.604 | 1.908 | 3.683 | 3.002 | 10.035 | 1.073 | 6.968 |
| Malta | 18.175 | 7.797 | 1.175 | 4.250 | 0.003 | 6.212 | 39.660 | 12.120 | 1.065 | 1.511 | 10.142 | 4.254 | 2.818 | 4.217 | 3.454 | 0.816 | 8.113 |
| Marshall Islands | 36.804 | 11.304 | 2.423 | 20.199 | 6.080 | 2.576 | 48.377 | 17.208 | 2.198 | 1.194 | 9.656 | 7.498 | 9.054 | 2.303 | 2.932 | 1.105 | 9.477 |
| Mauritania | 39.363 | 10.106 | 2.907 | 20.631 | 7.681 | 5.185 | 49.460 | 15.494 | 2.639 | 6.185 | 8.713 | 4.242 | 1.694 | 4.181 | 12.313 | 1.024 | 8.376 |
| Mauritius | 19.398 | 3.195 | 1.844 | 11.837 | 0.029 | 3.756 | 36.152 | 5.108 | 1.672 | 1.333 | 8.277 | 4.054 | 5.191 | 4.316 | 0.933 | 1.412 | 11.054 |
| Mexico | 27.052 | 10.150 | 1.170 | 12.176 | 0.697 | 5.804 | 41.743 | 15.557 | 1.060 | 2.942 | 6.640 | 6.404 | 4.929 | 3.440 | 3.992 | 1.233 | 5.550 |
| Micronesia (Federated States of) | 36.567 | 11.321 | 2.325 | 19.612 | 6.422 | 2.649 | 48.171 | 17.232 | 2.109 | 1.303 | 9.023 | 7.918 | 5.829 | 2.165 | 2.890 | 1.156 | 12.515 |
| Monaco | 10.068 | 4.448 | 1.070 | 1.875 | 0.001 | 3.046 | 34.144 | 7.055 | 0.970 | 0.193 | 9.228 | 5.376 | 2.972 | 3.939 | 1.795 | 0.770 | 8.110 |
| Mongolia | 30.296 | 11.047 | 2.391 | 13.639 | 2.728 | 4.435 | 48.264 | 16.842 | 2.169 | 6.384 | 10.478 | 3.753 | 1.910 | 4.823 | 3.290 | 1.538 | 11.315 |
| Montenegro | 17.266 | 11.152 | 1.551 | 1.035 | 1.150 | 3.313 | 48.637 | 16.992 | 1.407 | 3.553 | 9.627 | 5.881 | 3.076 | 4.865 | 4.668 | 0.856 | 12.218 |
| Morocco | 22.428 | 9.703 | 2.158 | 6.942 | 0.415 | 5.255 | 49.800 | 14.911 | 1.957 | 3.443 | 12.213 | 4.852 | 5.960 | 4.800 | 7.728 | 0.856 | 8.899 |
| Mozambique | 48.350 | 10.876 | 2.968 | 20.583 | 18.839 | 7.337 | 39.215 | 16.598 | 2.695 | 1.738 | 6.004 | 2.305 | 1.320 | 5.449 | 5.126 | 0.725 | 5.541 |
| Myanmar | 35.264 | 11.422 | 2.704 | 10.928 | 10.213 | 6.078 | 41.347 | 17.376 | 2.454 | 0.023 | 5.074 | 1.731 | 2.835 | 3.486 | 7.052 | 1.159 | 9.427 |
| Namibia | 34.835 | 11.314 | 2.350 | 17.156 | 3.795 | 5.588 | 44.105 | 17.222 | 2.132 | 6.447 | 6.564 | 3.648 | 2.267 | 4.188 | 4.025 | 1.259 | 7.687 |
| Nauru | 29.834 | 11.051 | 2.372 | 17.175 | 0.270 | 2.180 | 49.120 | 16.849 | 2.152 | 0.440 | 8.544 | 10.014 | 5.376 | 4.646 | 3.068 | 1.159 | 11.711 |
| Nepal | 39.055 | 10.267 | 3.281 | 12.227 | 12.299 | 8.776 | 42.076 | 15.726 | 2.979 | 5.227 | 5.986 | 2.096 | 2.882 | 2.277 | 4.796 | 1.657 | 8.605 |
| Netherlands | 20.794 | 7.669 | 1.137 | 10.469 | 0.001 | 3.082 | 35.653 | 11.930 | 1.030 | 1.351 | 7.684 | 4.140 | 2.367 | 3.780 | 2.324 | 0.785 | 7.111 |
| New Zealand | 23.453 | 10.170 | 0.954 | 10.136 | 0.003 | 4.259 | 40.342 | 15.586 | 0.865 | 1.014 | 8.859 | 5.957 | 3.458 | 3.044 | 2.228 | 0.823 | 7.424 |
| Nicaragua | 39.375 | 10.136 | 1.485 | 21.136 | 7.801 | 5.819 | 40.807 | 15.537 | 1.346 | 2.828 | 5.486 | 5.179 | 2.888 | 4.524 | 3.016 | 1.712 | 7.704 |
| Niger | 44.000 | 11.559 | 3.051 | 12.060 | 17.373 | 10.115 | 42.368 | 17.570 | 2.770 | 0.102 | 7.638 | 1.672 | 2.587 | 4.034 | 10.608 | 0.983 | 4.211 |
| Nigeria | 34.417 | 11.555 | 3.190 | 11.090 | 9.038 | 5.292 | 39.263 | 17.565 | 2.896 | 0.110 | 6.726 | 3.107 | 1.818 | 5.115 | 5.896 | 1.428 | 2.742 |
| Niue | 29.806 | 11.020 | 2.032 | 17.672 | 0.277 | 1.920 | 47.099 | 16.804 | 1.843 | 0.354 | 9.705 | 8.716 | 7.477 | 3.896 | 2.176 | 1.121 | 8.296 |
| North Macedonia | 17.572 | 10.267 | 1.534 | 1.802 | 0.978 | 4.060 | 47.688 | 15.725 | 1.391 | 1.533 | 9.759 | 4.821 | 2.978 | 4.794 | 5.895 | 1.068 | 13.451 |
| Northern Mariana Islands | 26.554 | 10.522 | 1.769 | 14.890 | 0.081 | 1.739 | 47.920 | 16.093 | 1.604 | 0.087 | 9.613 | 9.410 | 7.290 | 3.788 | 3.156 | 1.179 | 9.675 |
| Norway | 19.639 | 5.036 | 0.996 | 11.765 | 0.000 | 3.129 | 35.007 | 7.961 | 0.902 | 2.752 | 9.692 | 4.283 | 2.897 | 4.372 | 1.246 | 0.698 | 6.909 |
| Oman | 23.769 | 11.350 | 1.477 | 8.461 | 0.004 | 4.649 | 52.216 | 17.273 | 1.339 | 4.637 | 9.360 | 7.233 | 4.083 | 4.658 | 12.945 | 0.974 | 7.386 |
| Pakistan | 41.782 | 11.443 | 4.321 | 18.447 | 8.495 | 7.927 | 52.676 | 17.406 | 3.927 | 4.277 | 11.130 | 2.581 | 3.749 | 4.460 | 12.832 | 1.123 | 9.202 |
| Palau | 28.701 | 10.915 | 1.868 | 16.919 | 0.003 | 1.831 | 46.309 | 16.654 | 1.694 | 0.290 | 9.440 | 8.532 | 6.920 | 3.789 | 2.665 | 1.141 | 7.927 |
| Palestine | 24.856 | 10.982 | 1.754 | 8.550 | 0.465 | 5.605 | 48.391 | 16.749 | 1.590 | 2.526 | 10.179 | 6.526 | 3.542 | 2.893 | 6.405 | 1.010 | 11.302 |
| Panama | 26.241 | 5.677 | 1.663 | 15.792 | 0.170 | 5.404 | 32.049 | 8.939 | 1.508 | 2.158 | 5.762 | 4.650 | 3.256 | 3.990 | 2.146 | 1.214 | 4.021 |
| Papua New Guinea | 38.161 | 11.463 | 2.385 | 13.305 | 15.013 | 2.888 | 44.191 | 17.433 | 2.164 | 2.313 | 8.520 | 3.107 | 4.112 | 2.118 | 2.805 | 0.928 | 11.716 |
| Paraguay | 26.810 | 4.990 | 1.690 | 15.128 | 2.524 | 5.286 | 35.515 | 7.889 | 1.532 | 1.521 | 7.121 | 4.974 | 3.089 | 4.048 | 4.243 | 1.041 | 7.169 |
| Peru | 28.499 | 10.757 | 1.830 | 12.352 | 1.087 | 5.862 | 37.189 | 16.429 | 1.659 | 3.492 | 6.212 | 5.205 | 1.799 | 2.718 | 2.771 | 0.675 | 3.450 |
| Philippines | 31.033 | 11.415 | 1.926 | 11.324 | 6.471 | 4.286 | 38.643 | 17.366 | 1.747 | 1.265 | 4.604 | 2.305 | 1.769 | 3.009 | 3.103 | 1.263 | 9.901 |
| Poland | 19.488 | 11.018 | 1.558 | 4.230 | 0.192 | 3.843 | 45.220 | 16.801 | 1.413 | 4.951 | 8.919 | 4.387 | 3.148 | 4.169 | 3.287 | 0.853 | 9.341 |
| Portugal | 19.124 | 9.693 | 1.231 | 4.562 | 0.007 | 4.986 | 41.772 | 14.898 | 1.115 | 2.934 | 8.743 | 4.605 | 3.227 | 3.443 | 3.130 | 0.615 | 8.976 |
| Puerto Rico | 28.180 | 6.404 | 1.570 | 19.332 | 0.001 | 3.358 | 38.292 | 10.039 | 1.424 | 0.445 | 10.080 | 7.194 | 6.043 | 3.801 | 2.692 | 0.837 | 3.967 |
| Qatar | 12.985 | 7.617 | 1.213 | 0.904 | 0.000 | 3.784 | 48.983 | 11.853 | 1.099 | 0.376 | 10.848 | 8.549 | 4.900 | 3.492 | 13.025 | 0.994 | 8.837 |
| Republic of Korea | 14.427 | 5.895 | 1.015 | 4.783 | 0.002 | 3.519 | 34.448 | 9.269 | 0.920 | 1.918 | 6.071 | 2.745 | 3.044 | 1.956 | 5.341 | 0.793 | 8.832 |
| Republic of Moldova | 25.872 | 10.580 | 1.662 | 9.975 | 2.253 | 4.201 | 46.043 | 16.175 | 1.507 | 5.237 | 7.542 | 4.734 | 2.282 | 5.459 | 4.786 | 1.447 | 9.681 |
| Romania | 15.832 | 10.602 | 1.620 | 0.418 | 0.228 | 3.679 | 46.328 | 16.207 | 1.469 | 4.871 | 8.507 | 4.613 | 2.573 | 4.461 | 5.450 | 0.925 | 10.197 |
| Russian Federation | 23.157 | 10.872 | 1.484 | 9.301 | 0.046 | 3.466 | 45.457 | 16.592 | 1.346 | 4.355 | 8.262 | 4.823 | 2.039 | 4.432 | 4.846 | 1.006 | 9.994 |
| Rwanda | 45.672 | 11.492 | 1.988 | 16.997 | 20.134 | 5.528 | 35.533 | 17.474 | 1.803 | 2.934 | 6.101 | 2.174 | 0.997 | 3.280 | 0.943 | 0.678 | 5.295 |
| Saint Kitts and Nevis | 25.699 | 8.230 | 1.933 | 13.824 | 0.023 | 4.173 | 38.791 | 12.760 | 1.753 | 1.583 | 9.097 | 5.679 | 4.064 | 4.542 | 2.383 | 0.867 | 4.505 |
| Saint Lucia | 31.806 | 10.874 | 1.980 | 17.348 | 0.248 | 5.321 | 40.679 | 16.596 | 1.796 | 1.300 | 9.600 | 4.531 | 4.471 | 3.778 | 2.420 | 0.885 | 4.362 |
| Saint Vincent and the Grenadines | 30.212 | 10.528 | 2.044 | 15.108 | 0.269 | 5.949 | 38.986 | 16.100 | 1.854 | 0.740 | 8.650 | 3.874 | 4.137 | 3.497 | 2.250 | 0.888 | 5.149 |
| Samoa | 39.776 | 11.160 | 2.012 | 21.974 | 9.198 | 2.355 | 48.841 | 17.003 | 1.825 | 0.319 | 10.837 | 9.326 | 7.183 | 3.439 | 1.421 | 1.082 | 10.856 |
| San Marino | 19.727 | 8.788 | 1.135 | 8.501 | 0.001 | 2.710 | 40.533 | 13.580 | 1.028 | 1.655 | 9.314 | 5.092 | 2.784 | 4.051 | 3.987 | 0.750 | 7.591 |
| Sao Tome and Principe | 40.018 | 11.246 | 2.672 | 18.940 | 8.742 | 6.131 | 37.584 | 17.126 | 2.425 | 0.426 | 7.916 | 3.652 | 2.162 | 5.908 | 1.581 | 1.175 | 2.420 |
| Saudi Arabia | 25.464 | 10.979 | 1.580 | 10.055 | 0.002 | 5.416 | 53.556 | 16.746 | 1.432 | 3.668 | 9.890 | 8.280 | 5.541 | 3.064 | 13.764 | 1.074 | 8.998 |
| Senegal | 41.005 | 9.963 | 3.926 | 13.939 | 16.218 | 5.413 | 41.701 | 15.287 | 3.567 | 0.563 | 7.015 | 2.685 | 2.797 | 4.178 | 7.804 | 0.859 | 6.837 |
| Serbia | 23.234 | 10.465 | 1.554 | 8.582 | 0.951 | 3.818 | 47.027 | 16.010 | 1.409 | 3.163 | 8.340 | 4.965 | 2.781 | 5.196 | 6.141 | 0.628 | 11.781 |
| Seychelles | 29.807 | 11.105 | 1.767 | 17.066 | 0.008 | 3.069 | 43.514 | 16.924 | 1.602 | 1.465 | 6.602 | 5.323 | 4.640 | 4.177 | 2.707 | 1.266 | 9.650 |
| Sierra Leone | 45.042 | 11.531 | 3.021 | 16.241 | 17.147 | 7.695 | 39.657 | 17.530 | 2.742 | 0.216 | 5.704 | 2.557 | 1.947 | 5.588 | 3.621 | 1.048 | 7.059 |
| Singapore | 20.165 | 9.726 | 1.475 | 6.424 | 0.002 | 4.075 | 37.135 | 14.945 | 1.337 | 2.263 | 7.032 | 3.350 | 3.740 | 1.640 | 2.381 | 1.004 | 6.771 |
| Slovakia | 22.051 | 9.901 | 1.526 | 9.047 | 0.011 | 3.395 | 43.989 | 15.198 | 1.383 | 2.545 | 8.741 | 4.490 | 2.335 | 4.849 | 4.840 | 0.792 | 10.128 |
| Slovenia | 22.695 | 9.429 | 1.315 | 10.687 | 0.069 | 3.092 | 42.841 | 14.514 | 1.192 | 2.474 | 7.825 | 5.133 | 2.509 | 4.942 | 3.837 | 0.755 | 10.283 |
| Solomon Islands | 44.815 | 11.502 | 2.447 | 19.464 | 17.493 | 3.801 | 43.669 | 17.489 | 2.220 | 2.342 | 7.131 | 4.380 | 3.498 | 1.940 | 2.409 | 1.037 | 11.906 |
| Somalia | 50.297 | 11.441 | 2.968 | 20.393 | 19.716 | 9.498 | 38.525 | 17.403 | 2.694 | 1.359 | 6.902 | 2.091 | 1.367 | 3.362 | 4.647 | 0.687 | 5.752 |
| South Africa | 28.239 | 9.051 | 2.719 | 13.620 | 1.276 | 4.889 | 41.670 | 13.964 | 2.468 | 5.624 | 4.935 | 5.461 | 2.365 | 4.921 | 2.138 | 1.358 | 8.544 |
| South Sudan | 44.319 | 11.417 | 2.555 | 17.350 | 16.862 | 6.124 | 39.461 | 17.368 | 2.318 | 1.236 | 5.474 | 1.551 | 1.413 | 3.653 | 8.485 | 0.676 | 5.483 |
| Spain | 20.446 | 9.295 | 1.136 | 7.129 | 0.006 | 4.471 | 40.799 | 14.319 | 1.030 | 1.486 | 7.675 | 4.957 | 2.919 | 3.863 | 4.120 | 0.727 | 9.089 |
| Sri Lanka | 29.956 | 11.552 | 1.903 | 12.805 | 3.879 | 3.680 | 39.082 | 17.560 | 1.726 | 0.246 | 5.491 | 2.581 | 2.996 | 4.412 | 3.146 | 1.170 | 7.758 |
| Sudan | 34.418 | 11.141 | 2.575 | 11.161 | 6.642 | 8.660 | 51.378 | 16.977 | 2.337 | 4.582 | 10.453 | 4.987 | 3.158 | 5.026 | 12.030 | 1.003 | 7.782 |
| Suriname | 23.911 | 3.847 | 2.194 | 14.223 | 0.373 | 5.322 | 32.817 | 6.126 | 1.990 | 0.690 | 7.556 | 3.563 | 5.270 | 2.521 | 2.324 | 0.911 | 7.718 |
| Sweden | 22.203 | 10.414 | 1.090 | 10.001 | 0.001 | 2.446 | 38.381 | 15.936 | 0.988 | 1.817 | 8.929 | 4.334 | 2.712 | 2.760 | 2.190 | 0.749 | 5.762 |
| Switzerland | 23.201 | 10.704 | 1.504 | 9.393 | 0.000 | 3.628 | 39.487 | 16.353 | 1.364 | 1.022 | 8.918 | 3.657 | 2.784 | 2.727 | 2.419 | 0.887 | 7.669 |
| Syrian Arab Republic | 26.870 | 10.835 | 2.180 | 10.339 | 0.035 | 6.456 | 49.870 | 16.539 | 1.977 | 0.954 | 10.614 | 7.694 | 3.383 | 3.847 | 8.791 | 0.982 | 10.632 |
| Taiwan (Province of China) | 12.567 | 1.833 | 1.212 | 5.666 | 0.045 | 4.383 | 33.193 | 2.956 | 1.099 | 0.316 | 7.974 | 4.482 | 3.022 | 2.362 | 5.092 | 0.856 | 10.840 |
| Tajikistan | 27.637 | 11.194 | 2.777 | 4.383 | 7.640 | 5.096 | 48.674 | 17.052 | 2.520 | 6.131 | 10.309 | 3.965 | 2.408 | 4.134 | 8.341 | 1.370 | 7.176 |
| Thailand | 26.151 | 10.920 | 1.472 | 12.371 | 0.535 | 3.465 | 38.549 | 16.662 | 1.334 | 0.019 | 4.719 | 3.285 | 2.383 | 2.515 | 5.212 | 1.343 | 8.850 |
| Timor-Leste | 42.052 | 11.423 | 2.028 | 19.954 | 10.389 | 6.907 | 40.270 | 17.377 | 1.839 | 2.348 | 4.396 | 1.328 | 1.667 | 4.506 | 1.813 | 1.182 | 12.250 |
| Togo | 46.611 | 11.541 | 3.867 | 20.732 | 15.504 | 6.262 | 39.535 | 17.545 | 3.514 | 0.420 | 5.924 | 2.638 | 1.496 | 4.076 | 5.721 | 1.027 | 5.492 |
| Tokelau | 31.089 | 11.212 | 2.083 | 18.992 | 0.007 | 2.146 | 48.602 | 17.077 | 1.889 | 0.620 | 9.747 | 8.499 | 8.407 | 3.549 | 2.519 | 1.043 | 9.671 |
| Tonga | 36.026 | 11.207 | 2.128 | 19.696 | 6.069 | 2.408 | 49.110 | 17.070 | 1.930 | 0.885 | 9.227 | 10.269 | 6.161 | 4.191 | 2.184 | 1.080 | 10.904 |
| Trinidad and Tobago | 22.712 | 3.684 | 1.896 | 15.468 | 0.002 | 3.237 | 34.418 | 5.871 | 1.719 | 0.424 | 9.126 | 5.264 | 4.090 | 4.425 | 1.934 | 0.888 | 7.182 |
| Tunisia | 19.582 | 9.683 | 1.799 | 3.988 | 0.023 | 5.541 | 48.464 | 14.883 | 1.631 | 1.044 | 10.064 | 5.591 | 3.654 | 3.489 | 9.929 | 0.947 | 11.697 |
| Türkiye | 16.236 | 10.873 | 1.825 | 0.126 | 0.036 | 4.116 | 47.745 | 16.594 | 1.655 | 0.398 | 11.537 | 6.122 | 3.340 | 3.335 | 6.090 | 1.010 | 11.332 |
| Turkmenistan | 17.514 | 11.465 | 2.341 | 1.211 | 0.005 | 3.425 | 52.873 | 17.436 | 2.124 | 7.623 | 10.409 | 3.926 | 2.371 | 4.637 | 11.970 | 1.570 | 9.082 |
| Tuvalu | 33.294 | 11.299 | 2.272 | 18.806 | 2.483 | 2.812 | 46.415 | 17.202 | 2.061 | 1.196 | 8.101 | 7.922 | 3.812 | 3.434 | 2.669 | 1.095 | 11.610 |
| Uganda | 46.142 | 11.260 | 2.276 | 20.140 | 16.914 | 6.400 | 34.126 | 17.145 | 2.065 | 0.309 | 5.090 | 2.488 | 1.574 | 3.722 | 2.702 | 0.742 | 3.855 |
| Ukraine | 18.840 | 10.920 | 1.451 | 4.663 | 0.397 | 2.641 | 46.050 | 16.662 | 1.315 | 5.002 | 8.929 | 4.292 | 1.768 | 5.100 | 5.274 | 1.163 | 9.229 |
| United Arab Emirates | 21.939 | 9.076 | 1.581 | 9.629 | 0.000 | 3.473 | 51.221 | 14.000 | 1.434 | 0.234 | 11.231 | 8.986 | 5.490 | 3.460 | 12.662 | 1.091 | 9.420 |
| United Kingdom | 21.047 | 9.599 | 1.193 | 9.091 | 0.000 | 2.768 | 39.620 | 14.761 | 1.082 | 4.932 | 7.638 | 5.121 | 2.393 | 3.400 | 1.569 | 0.854 | 6.584 |
| United Republic of Tanzania | 42.585 | 11.315 | 2.836 | 16.091 | 16.647 | 4.733 | 35.813 | 17.224 | 2.574 | 0.091 | 4.666 | 2.965 | 1.400 | 4.532 | 3.004 | 0.670 | 5.045 |
| United States of America | 15.448 | 3.090 | 0.988 | 9.405 | 0.001 | 2.733 | 34.424 | 4.943 | 0.895 | 0.512 | 8.700 | 6.673 | 4.595 | 2.646 | 5.355 | 1.098 | 5.552 |
| United States Virgin Islands | 21.447 | 5.727 | 1.762 | 12.549 | 0.004 | 3.005 | 37.217 | 9.014 | 1.598 | 0.306 | 9.405 | 7.137 | 5.732 | 3.716 | 2.382 | 0.856 | 4.823 |
| Uruguay | 24.445 | 7.559 | 1.503 | 12.352 | 0.059 | 5.269 | 40.744 | 11.767 | 1.362 | 5.082 | 9.529 | 4.962 | 2.356 | 3.482 | 2.335 | 0.742 | 8.684 |
| Uzbekistan | 18.527 | 11.291 | 2.864 | 0.233 | 1.494 | 3.791 | 50.638 | 17.189 | 2.600 | 6.314 | 10.104 | 4.387 | 2.427 | 4.352 | 9.690 | 1.590 | 8.370 |
| Vanuatu | 42.956 | 11.388 | 2.555 | 18.364 | 16.025 | 3.635 | 43.332 | 17.327 | 2.318 | 1.285 | 8.908 | 4.222 | 5.437 | 4.452 | 1.982 | 1.095 | 6.982 |
| Venezuela (Bolivarian Republic of) | 25.963 | 7.719 | 1.669 | 12.470 | 0.068 | 6.721 | 40.210 | 12.004 | 1.513 | 7.091 | 5.825 | 5.867 | 2.972 | 3.421 | 2.839 | 1.215 | 6.871 |
| Viet Nam | 28.329 | 11.396 | 1.678 | 8.241 | 5.736 | 4.886 | 39.926 | 17.339 | 1.522 | 0.476 | 3.942 | 1.150 | 1.513 | 3.981 | 5.975 | 0.901 | 11.375 |
| Yemen | 39.443 | 11.502 | 4.212 | 16.257 | 6.010 | 9.241 | 50.101 | 17.490 | 3.828 | 5.873 | 10.237 | 3.622 | 2.267 | 3.084 | 7.902 | 0.942 | 10.635 |
| Zambia | 43.852 | 11.266 | 3.280 | 20.490 | 13.517 | 4.857 | 38.683 | 17.155 | 2.978 | 0.882 | 4.898 | 3.480 | 2.271 | 3.517 | 4.490 | 0.701 | 6.238 |
| Zimbabwe | 44.591 | 9.701 | 2.807 | 20.930 | 14.241 | 6.894 | 39.058 | 14.909 | 2.548 | 1.927 | 5.356 | 3.040 | 2.044 | 4.301 | 4.606 | 1.338 | 7.445 |
